# Supplementary material
Source: Springer Nature journal article supplement (https://www.springermedizin.de/resource/supplementary/12888_2013_1388_MOESM5_ESM.pdf/9480098)
Supplement: MOESM5 [file 9480098]

## Safety Manual:

### DAD Trial

**Cognitive behavioural therapy vs. sertraline in patients with depression and poorly controlled diabetes mellitus: A randomized controlled trial**

**Short title:** Diabetes and Depression Study (DAD Study)

**Eudra CT No:** 2005-004525-26

**Finale Version 1.0, 20. April 2006**

#### Verantwortlichkeiten:

| <b>Aufgabe</b>                  | <b>Institution</b>              | <b>Name</b>                     |
|---------------------------------|---------------------------------|---------------------------------|
| SAE-Meldung                     | Prüfzentren,<br>Studienzentren  | Prüfer, Psychologen             |
| SAE-Registrierung               | KKS Mainz                       |                                 |
| SAE-Zweitbewertung              | Sponsor, LKP                    | PD Dr. Petrak<br>PD Dr. Müller  |
| Nutzen-Risiko-Bewertung         | Sponsor, LKP,<br>Advisory Board | PD Dr. Petrak<br>PD Dr. Müller  |
| Amendment<br>Abbruch der Studie | Sponsor                         | PD Dr. Petrak                   |
| Entblindung von SUSARs          | entfällt                        |                                 |
| Meldung (SUSAR, Todesfälle)     | Sponsor                         | PD Dr. Petrak                   |
| Dokumentation aller SAEs        | KKS Mainz                       | Verantwortlicher<br>Mitarbeiter |
| Jahresbericht (EK, BfArM)       | Sponsor                         | PD Dr. Petrak                   |
| Bericht an Advisory Board       | Sponsor                         | PD Dr. Petrak                   |

## Meldewege für SAE und SUSAR – DAD Studie

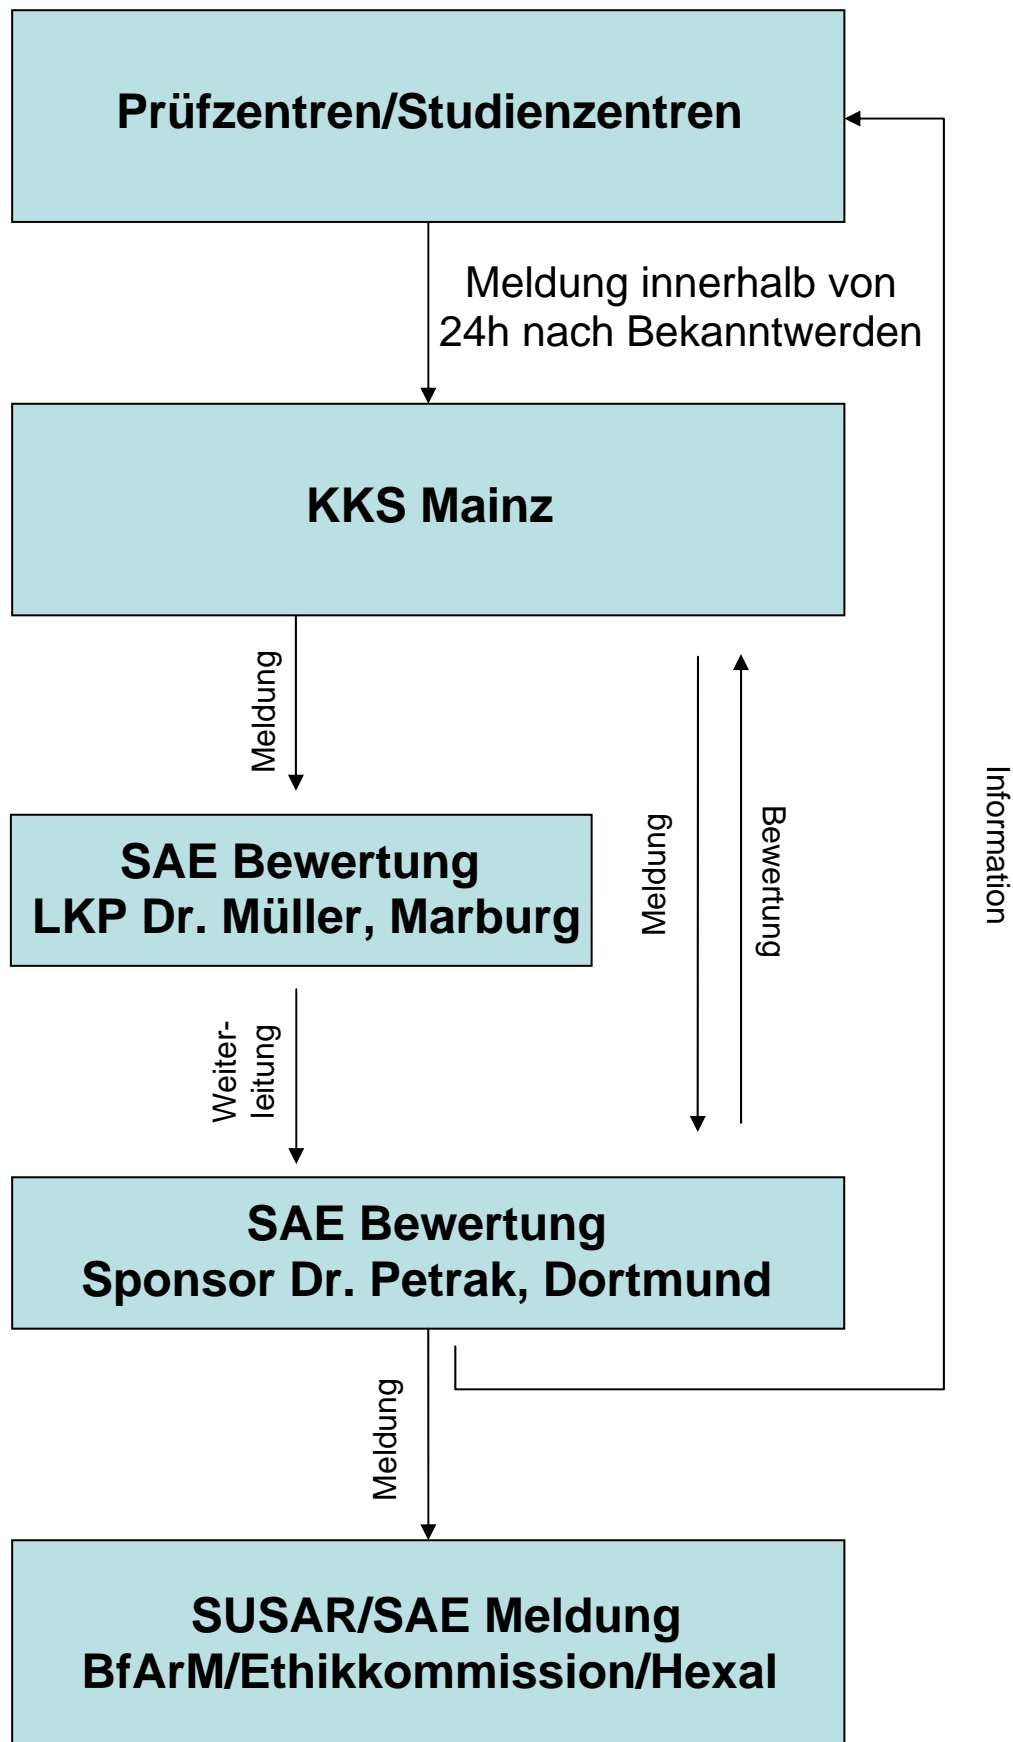



EUDRACT Nr.: 2005-004525-26

SAE-BERICHT

Seite 1 von 2

|                                                                                                                                                                                                                                                                                                                                                                                                                                                                                                                           |                                                                      |                                                                                   |                                          |                                                                                                                                                                            |
|---------------------------------------------------------------------------------------------------------------------------------------------------------------------------------------------------------------------------------------------------------------------------------------------------------------------------------------------------------------------------------------------------------------------------------------------------------------------------------------------------------------------------|----------------------------------------------------------------------|-----------------------------------------------------------------------------------|------------------------------------------|----------------------------------------------------------------------------------------------------------------------------------------------------------------------------|
| <b>PROTOKOLL TITEL:</b>                                                                                                                                                                                                                                                                                                                                                                                                                                                                                                   |                                                                      | DAD Diabetes –Depressions-Studie                                                  |                                          |                                                                                                                                                                            |
| <b>INDIKATION:</b>                                                                                                                                                                                                                                                                                                                                                                                                                                                                                                        |                                                                      | Depression und schlecht eingestellter Diabetes mellitus                           |                                          |                                                                                                                                                                            |
| <b>SPONSOR:</b>                                                                                                                                                                                                                                                                                                                                                                                                                                                                                                           |                                                                      | Dr. rer. soc. Dipl.-Psych. Frank Petrak                                           |                                          |                                                                                                                                                                            |
| Bitte alle Informationen vollständig und wahrheitsgemäß mit schwarzem Kugelschreiber eintragen                                                                                                                                                                                                                                                                                                                                                                                                                            |                                                                      |                                                                                   |                                          |                                                                                                                                                                            |
| <b>PATIENTEN IDENTIFIZIERUNG</b>                                                                                                                                                                                                                                                                                                                                                                                                                                                                                          |                                                                      |                                                                                   |                                          |                                                                                                                                                                            |
| Patienten Nr. (Random Nr.)                                                                                                                                                                                                                                                                                                                                                                                                                                                                                                | Geschlecht:<br><input type="checkbox"/> M <input type="checkbox"/> W | Alter (Jahre):                                                                    | Geburtsdatum:                            | SAE Nr.:                                                                                                                                                                   |
| <b>INFORMATIONEN ZUM SAE-BERICHT</b>                                                                                                                                                                                                                                                                                                                                                                                                                                                                                      |                                                                      |                                                                                   |                                          |                                                                                                                                                                            |
| <input type="checkbox"/> INITIAL Bericht                                                                                                                                                                                                                                                                                                                                                                                                                                                                                  | Name des Prüfarztes:                                                 |                                                                                   |                                          |                                                                                                                                                                            |
| Datum:                                                                                                                                                                                                                                                                                                                                                                                                                                                                                                                    | Zentrums Nr.:                                                        | Land: Deutschland                                                                 |                                          |                                                                                                                                                                            |
| <input type="checkbox"/> FOLLOW-UP Bericht                                                                                                                                                                                                                                                                                                                                                                                                                                                                                | Institution:                                                         | Telefon Nr.:                                                                      |                                          |                                                                                                                                                                            |
| Datum:                                                                                                                                                                                                                                                                                                                                                                                                                                                                                                                    | E-mail:                                                              | FAX Nr.:                                                                          |                                          |                                                                                                                                                                            |
| <b>Schweregrad und Grund des SAE</b>                                                                                                                                                                                                                                                                                                                                                                                                                                                                                      |                                                                      |                                                                                   |                                          |                                                                                                                                                                            |
| <input type="checkbox"/> Tod <input type="checkbox"/> führt zu bleibenden/signifikanten Schäden/Behinderungen<br><input type="checkbox"/> lebensbedrohlich <input type="checkbox"/> stellt eine angeborene Missbildung oder Geburtsfehler dar<br><input type="checkbox"/> stationäre Behandlung oder eine Verlängerung des stationären Aufenthaltes erforderlich<br><input type="checkbox"/> andere wichtige medizinische Gründe                                                                                          |                                                                      |                                                                                   |                                          |                                                                                                                                                                            |
| <b>SERIOUS ADVERSE EVENT (SAE)</b>                                                                                                                                                                                                                                                                                                                                                                                                                                                                                        |                                                                      |                                                                                   |                                          |                                                                                                                                                                            |
| <b>SAE:</b> Verdachtsdiagnose und Symptome (wenn möglich)                                                                                                                                                                                                                                                                                                                                                                                                                                                                 |                                                                      |                                                                                   |                                          | <b>Beginn des SAE</b><br>(TT/MM/JJJJ)<br>_____<br><br><b>Ende des SAE</b><br>(TT/MM/JJJJ)<br>_____<br><br><b>Todesdatum</b><br>(falls zutreffend)<br>(TT/MM/JJJJ)<br>_____ |
| <b>SCHWEREGRAD/INTENSITÄT des SAE</b>                                                                                                                                                                                                                                                                                                                                                                                                                                                                                     |                                                                      |                                                                                   |                                          |                                                                                                                                                                            |
| <b>Kausalzusammenhang zur Studie :</b> <input type="checkbox"/> sicher <input type="checkbox"/> wahrscheinlich <input type="checkbox"/> möglich <input type="checkbox"/> unwahrscheinlich <input type="checkbox"/> nicht sicher<br><input type="checkbox"/> ungeklärt<br><br><input type="checkbox"/> Zusammenhang mit der kognitiven Verhaltenstherapie<br><input type="checkbox"/> Zusammenhang mit der Studienmedikation (Sertraline)<br><input type="checkbox"/> Andere Zusammenhänge zu studienrelevanten Prozeduren |                                                                      |                                                                                   |                                          |                                                                                                                                                                            |
| <b>STUDIENMEDIKATION</b>                                                                                                                                                                                                                                                                                                                                                                                                                                                                                                  |                                                                      |                                                                                   |                                          |                                                                                                                                                                            |
| Sertralin® / Sertralinhydrochlorid<br>Chargennummer.                                                                                                                                                                                                                                                                                                                                                                                                                                                                      | Datum der<br>ersten<br>Einnahme                                      | Zeit in Stunden<br>zwischen der letzten<br>Einnahme und Beginn<br>des Ereignisses | Tägliche Dosis in mg<br>Art der Einnahme |                                                                                                                                                                            |
|                                                                                                                                                                                                                                                                                                                                                                                                                                                                                                                           |                                                                      |                                                                                   |                                          |                                                                                                                                                                            |
| <b>Zusammenhang mit der Studienmedikation:</b> <input type="checkbox"/> sicher <input type="checkbox"/> wahrscheinlich <input type="checkbox"/> möglich <input type="checkbox"/> unwahrscheinlich<br><input type="checkbox"/> nicht sicher <input type="checkbox"/> ungeklärt                                                                                                                                                                                                                                             |                                                                      |                                                                                   |                                          |                                                                                                                                                                            |

EUDRACT Nr.: 2005-004525-26

SAE-BERICHT

Seite 2 von 2

| Bitte alle Informationen vollständig und wahrheitsgemäß mit schwarzem Kugelschreiber eintragen                                                                       |               |                                                                                                                                                                                                                                                                                                                                                                                                                                                                                                                                                                                   |                                                                                                |                                                                                                                                                                                                                                                                                                                                                                                  |
|----------------------------------------------------------------------------------------------------------------------------------------------------------------------|---------------|-----------------------------------------------------------------------------------------------------------------------------------------------------------------------------------------------------------------------------------------------------------------------------------------------------------------------------------------------------------------------------------------------------------------------------------------------------------------------------------------------------------------------------------------------------------------------------------|------------------------------------------------------------------------------------------------|----------------------------------------------------------------------------------------------------------------------------------------------------------------------------------------------------------------------------------------------------------------------------------------------------------------------------------------------------------------------------------|
| <b>PATIENTEN INFORMATION</b>                                                                                                                                         |               |                                                                                                                                                                                                                                                                                                                                                                                                                                                                                                                                                                                   |                                                                                                |                                                                                                                                                                                                                                                                                                                                                                                  |
| Patient- Nr. (Random Nr.)                                                                                                                                            | Alter (Jahre) | SAE Nr.                                                                                                                                                                                                                                                                                                                                                                                                                                                                                                                                                                           | <input type="checkbox"/> INITIALER BERICHT Datum:<br><input type="checkbox"/> FOLLOW-UP Datum: |                                                                                                                                                                                                                                                                                                                                                                                  |
| <b>RELEVANTE MEDIZINISCHE ANAMNESE</b>                                                                                                                               |               |                                                                                                                                                                                                                                                                                                                                                                                                                                                                                                                                                                                   | Start Datum                                                                                    | End Datum                                                                                                                                                                                                                                                                                                                                                                        |
| 1.                                                                                                                                                                   |               |                                                                                                                                                                                                                                                                                                                                                                                                                                                                                                                                                                                   |                                                                                                |                                                                                                                                                                                                                                                                                                                                                                                  |
| 2.                                                                                                                                                                   |               |                                                                                                                                                                                                                                                                                                                                                                                                                                                                                                                                                                                   |                                                                                                |                                                                                                                                                                                                                                                                                                                                                                                  |
| 3.                                                                                                                                                                   |               |                                                                                                                                                                                                                                                                                                                                                                                                                                                                                                                                                                                   |                                                                                                |                                                                                                                                                                                                                                                                                                                                                                                  |
| <b>RELEVANTE BEGLEITMEDIKATION</b>                                                                                                                                   |               |                                                                                                                                                                                                                                                                                                                                                                                                                                                                                                                                                                                   |                                                                                                |                                                                                                                                                                                                                                                                                                                                                                                  |
|                                                                                                                                                                      | Indikation    | Tägliche Dosierung, Einheit, Art der Einnahme                                                                                                                                                                                                                                                                                                                                                                                                                                                                                                                                     | Datum der ersten Einnahme                                                                      | Datum der letzten Einnahme                                                                                                                                                                                                                                                                                                                                                       |
| 1.                                                                                                                                                                   |               |                                                                                                                                                                                                                                                                                                                                                                                                                                                                                                                                                                                   |                                                                                                |                                                                                                                                                                                                                                                                                                                                                                                  |
| 2.                                                                                                                                                                   |               |                                                                                                                                                                                                                                                                                                                                                                                                                                                                                                                                                                                   |                                                                                                |                                                                                                                                                                                                                                                                                                                                                                                  |
| 3.                                                                                                                                                                   |               |                                                                                                                                                                                                                                                                                                                                                                                                                                                                                                                                                                                   |                                                                                                |                                                                                                                                                                                                                                                                                                                                                                                  |
| <b>RELEVANTE LABOR- ODER ANDERE UNTERSUCHUNGSERGEBNISSE</b>                                                                                                          |               |                                                                                                                                                                                                                                                                                                                                                                                                                                                                                                                                                                                   |                                                                                                |                                                                                                                                                                                                                                                                                                                                                                                  |
|                                                                                                                                                                      | Normalwert    | Datum                                                                                                                                                                                                                                                                                                                                                                                                                                                                                                                                                                             | Ergebnis                                                                                       |                                                                                                                                                                                                                                                                                                                                                                                  |
| 1.                                                                                                                                                                   |               |                                                                                                                                                                                                                                                                                                                                                                                                                                                                                                                                                                                   |                                                                                                |                                                                                                                                                                                                                                                                                                                                                                                  |
| 2.                                                                                                                                                                   |               |                                                                                                                                                                                                                                                                                                                                                                                                                                                                                                                                                                                   |                                                                                                |                                                                                                                                                                                                                                                                                                                                                                                  |
| 3.                                                                                                                                                                   |               |                                                                                                                                                                                                                                                                                                                                                                                                                                                                                                                                                                                   |                                                                                                |                                                                                                                                                                                                                                                                                                                                                                                  |
| 4.                                                                                                                                                                   |               |                                                                                                                                                                                                                                                                                                                                                                                                                                                                                                                                                                                   |                                                                                                |                                                                                                                                                                                                                                                                                                                                                                                  |
| <b>BEHANDLUNG DES SAE</b>                                                                                                                                            |               | <b>ÄNDERUNG DER STUDIENMEDIKATION</b>                                                                                                                                                                                                                                                                                                                                                                                                                                                                                                                                             |                                                                                                | <b>AUSGANG DES SAE</b>                                                                                                                                                                                                                                                                                                                                                           |
| <input type="checkbox"/> keine<br><input type="checkbox"/> Medikamentengabe<br><input type="checkbox"/> andere<br>spezifizieren:<br>_____<br>_____<br>_____<br>_____ |               | <input type="checkbox"/> Dosis nicht geändert<br><input type="checkbox"/> Dosis wurde reduziert<br><input type="checkbox"/> Dosis wurde erhöht<br><input type="checkbox"/> Medikation wurde abgesetzt:<br>Datum: _____<br>Ist eine Reexposition erfolgt?<br><input type="checkbox"/> Ja <input type="checkbox"/> Nein <input type="checkbox"/> Unbekannt<br>Kam es zu einer erneuten Reaktion?<br><input type="checkbox"/> Ja <input type="checkbox"/> Nein <input type="checkbox"/> Unbekannt<br><input type="checkbox"/> unbekannt<br><input type="checkbox"/> nicht zutreffend |                                                                                                | <input type="checkbox"/> wiederhergestellt<br><input type="checkbox"/> Besserung<br><input type="checkbox"/> nicht wiederhergestellt<br><input type="checkbox"/> wiederhergestellt mit Folgeerscheinungen<br><input type="checkbox"/> tödlich<br>Im Fall des Todes:<br>Autopsie? <input type="checkbox"/> Ja <input type="checkbox"/> Nein<br><input type="checkbox"/> unbekannt |
| <b>KOMMENTAR:</b>                                                                                                                                                    |               |                                                                                                                                                                                                                                                                                                                                                                                                                                                                                                                                                                                   |                                                                                                |                                                                                                                                                                                                                                                                                                                                                                                  |
| <b>UNTERSCHRIFT DES PRÜFARZTES</b>                                                                                                                                   |               |                                                                                                                                                                                                                                                                                                                                                                                                                                                                                                                                                                                   |                                                                                                |                                                                                                                                                                                                                                                                                                                                                                                  |
| Name _____ Unterschrift _____ Datum (TT/MM/JJJJ) _____                                                                                                               |               |                                                                                                                                                                                                                                                                                                                                                                                                                                                                                                                                                                                   |                                                                                                |                                                                                                                                                                                                                                                                                                                                                                                  |
| <b>FAX INNERHALB 24 STUNDEN AN: FAX No.</b>                                                                                                                          |               |                                                                                                                                                                                                                                                                                                                                                                                                                                                                                                                                                                                   |                                                                                                |                                                                                                                                                                                                                                                                                                                                                                                  |

## **ADVERSE EVENTS**

### **1 Definitions**

#### **1.1 Adverse Event**

According to GCP, an adverse event (AE) is defined as follows: Any untoward medical occurrence in a subject administered a pharmaceutical product and which does not necessarily have a causal relationship with this treatment. An AE can therefore be any unfavourable and unintended sign (including an abnormal laboratory finding), symptom, or disease temporally associated with the use of a medicinal investigational product, whether or not related to the medicinal investigational product.

An AE may be:

- New symptoms/medical conditions
- New diagnosis
- Changes of laboratory parameters
- Intercurrent diseases and accidents
- Worsening of medical conditions/diseases existing before clinical trial start
- Recurrence of disease
- Increase of frequency or intensity of episodically diseases.

Surgical procedures themselves are not AEs; they are therapeutic measures for conditions that require surgery. The condition for which the surgery is required may be an AE. Planned surgical measures permitted by the clinical trial protocol and the condition(s) leading to these measures are not AEs, if the condition leading to the measure was present prior to inclusion into the trial.

AEs fall into the categories "non-serious" and "serious".

#### **1.2 Serious Adverse Event**

A serious adverse event (SAE) is one that at any dose:

- Results in death
- Is life-threatening
- Requires subject hospitalization or prolongation of existing hospitalization
- Results in persistent or significant disability/incapacity or
- Is a congenital anomaly/birth defect.

##### **1.2.1 Suspected unexpected serious adverse reactions (SUSARs)**

All adverse drug reactions that are both, serious and unexpected.

## 2 Period of Observation and Documentation

All AEs reported by the subject or detected by the investigator, will be collected during the trial and must be documented on the appropriate pages of the CRF. AEs must also be documented in the subject's medical records.

In this trial, all AEs that occur after the subject has signed the informed consent document will be documented on the pages provided in the CRF (see Flowchart and chapters 6.1.5, 6.2.17 and 6.4). All subjects who have AEs, whether considered associated with the use of the trial medication or not, must be monitored to determine the outcome. The clinical course of the AE will be followed up by the time of resolve or normalization of changed laboratory parameters or until it has changed to a stable condition.

SAE will be followed up even after trial closure until the AE is resolved or normalization of changed laboratory parameters or until it has changed to a stable condition.

### 2.1 Assessment of AE intensity

The intensity of an AE should be assessed by the investigator as follows:

- mild: temporary event which is tolerated well by the subject and does not interfere with normal daily activities
- moderate: event which results in discomfort for the subject and impairs his/her normal daily activity.
- severe: event which results in substantial impairment of normal activities of subject.

### 2.2 Relation to trial participation

The investigator will evaluate each AE occurred after administration of investigational medicinal product regarding the coherency with the administration of the investigational medicinal product possibly exists:

- certain: if there is a reasonable possibility that the event may have been caused by trial participation. A certain event has a **strong temporal relationship** and an alternative cause is unlikely. E.g. the AE abates upon discontinuation of the trial participation and reappears when the trial participation is continued.
- probable: An AE that has a reasonable possibility that the event is likely to have been caused by trial participation. The AE has a **timely relationship** to the trial procedure(s) and **follows a known pattern of response**, but a potential alternative cause may be present.
- possible: An AE that has a reasonable possibility that the event may have been caused by trial participation. The AE has a **timely relationship** to the trial procedure(s); **however, follows no known pattern of response**, and an alternative cause seems more likely, or there is significant uncertainty about the cause of the event.

|                 |                                                                                                                                                                                                                     |
|-----------------|---------------------------------------------------------------------------------------------------------------------------------------------------------------------------------------------------------------------|
| improbable:     | An AE that does not follow a reasonable temporal sequence from trial participation and that is <b>likely to have been produced</b> by the subject's clinical state, other modes of therapy or other known etiology. |
| unrelated:      | An AE that does not follow a reasonable temporal sequence from trial participation and that is <b>definitely caused by</b> the subject's clinical state, other modes of therapy or other known etiology.            |
| Unknown         | <b>inadequate data</b> for assessment, <b>other data</b> may be expected                                                                                                                                            |
| not assessable: | <b>inadequate data</b> for assessment, <b>no other data</b> may be expected                                                                                                                                         |

### 2.3 Action taken

The investigator will record the action taken for each event according to the following:

- None
- Treatment required
- Hospitalization
- Patient withdrawn
- Other (specify)

### 2.4 Outcome of AE

The investigator will record the outcome for each event according to the following:

|            |                                                                                       |
|------------|---------------------------------------------------------------------------------------|
| Recovered: | The patient has completely recovered without any ongoing disadvantage.                |
| Improved:  | The patient recovers from the AE, but it is still present.                            |
| Ongoing:   | The patient has an ongoing disadvantage which is unlikely to disappear in the future. |

Death

lost to follow up

### 3 Reporting of Serious Adverse Events by Investigator

SAEs must be reported within 24 hours after the SAE becomes known using the "Serious Adverse Event" form.

SAE from the diabetological trial sites will be reported to:

**KKS Mainz**  
**Langenbeckstr. 2**  
**55131 Mainz**  
**FAX 06131/39-34634**



SAE from the psychologists in the coordinating institutions will be reported to:

**Westfälische Klinik Dortmund/  
Ruhr-Universität Bochum**

**FAX**

(number is requested and will be notified  
before start of patient enrolment)

The initial report must be as complete as possible including details of the current illness and (serious) adverse event and an assessment of the causal relationship between the event and the trial medication. The investigator must also inform the site monitor in all cases.

#### **4 Safety evaluation by the sponsor**

The investigator will give all informations to the sponsor that he needs for keeping the requirements without delay.

The trial sponsor is responsible for SAE management and reporting as required by German Drug Law (AMG) and GCP regulation (GCP-V).

SUSARs and safety issues as defined by GCP-V are subject of expedited reporting:

The competent authorities and the Ethics Committee should be notified as soon as possible but not later than 15 calendar days (7 days if fatal or life-threatening). All investigators should be informed too.

Work flow and procedures concerning pharmacovigilance are described in SOPs/Manuals.

#### **5 Emergency Unblinding**

The trial is unblinded concerning the study treatment.

#### **6 Emergency Treatment**

During and following a subject's participation in the trial, the investigator should ensure that adequate medical care is provided to a subject for any AEs including clinically significant laboratory values. The investigator should inform a subject when medical care is needed for intercurrent illness(es) of which the investigator becomes aware.
